# Supplementary material for: Patterns of invasive recurrence among patients originally treated for ductal carcinoma in situ by breast-conserving surgery versus mastectomy
Source: Springer Nature journal article supplement (doi:10.1007/s10549-021-06129-3), 2021-03-06
Supplement: MOESM1 [file 18937004]

**Supplemental Figure 1.** Overall survival of patients with an invasive recurrence after DCIS

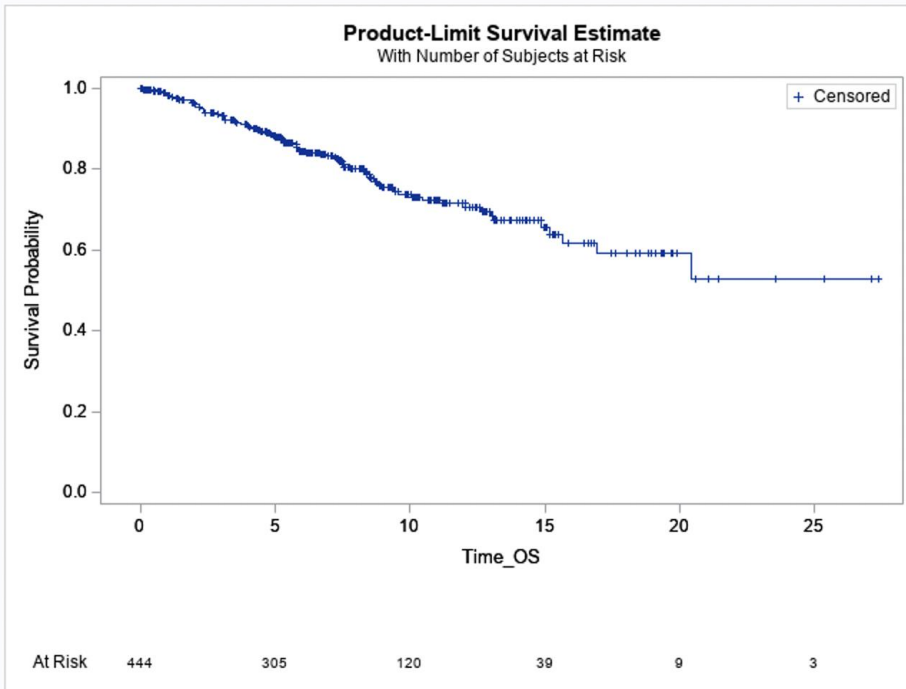

**Supplemental Table 1.** Comparison of invasive recurrence characteristics between patients who did and did not receive endocrine therapy

\*Missing data on receipt of endocrine therapy for 29 (6%) of patients

\*\*Unknown categories are not considered in p-value calculation

|                      | <b>Endocrine*</b><br><b>therapy</b><br><b>(n = 85)</b> | <b>No endocrine</b><br><b>therapy</b><br><b>(n = 338)</b> | <b>p-value**</b> |
|----------------------|--------------------------------------------------------|-----------------------------------------------------------|------------------|
| <b>ER status</b>     |                                                        |                                                           |                  |
| Positive             | 15 (19%)                                               | 59 (18%)                                                  | 0.9              |
| Negative             | 65 (81%)                                               | 271 (82%)                                                 |                  |
| Unknown**            | 5                                                      | 8                                                         |                  |
| <b>Histology</b>     |                                                        |                                                           |                  |
| Ductal               | 67 (91%)                                               | 247 (84%)                                                 | 0.5              |
| Lobular              | 4 (5%)                                                 | 24 (8%)                                                   |                  |
| Other                | 3 (4%)                                                 | 22 (8%)                                                   |                  |
| Unknown**            | 11                                                     | 45                                                        |                  |
| <b>Nuclear grade</b> |                                                        |                                                           |                  |
| High                 | 34 (46%)                                               | 121 (46%)                                                 | 0.5              |
| Intermediate         | 38 (51%)                                               | 127 (48%)                                                 |                  |
| Low                  | 2 (3%)                                                 | 17 (6%)                                                   |                  |
| Unknown**            | 11                                                     | 73                                                        |                  |

**Supplemental Table 2.** Patterns of invasive recurrence after treatment of DCIS among patients treated with BCS and radiation vs. mastectomy

\*Missing data for date of diagnosis of distant recurrence in BCS + radiation group

|                                                        | <b>BCS + radiation<br/>(n = 201)</b> | <b>Mastectomy<br/>(n = 85)</b> | <b>p-value</b> |
|--------------------------------------------------------|--------------------------------------|--------------------------------|----------------|
| <b>Presentation of invasive recurrence</b>             |                                      |                                | <0.001         |
| Isolated local                                         | 181 (90%)                            | 10 (12%)                       |                |
| Local and regional                                     | 1 (<1%)                              | 5 (6%)                         |                |
| Local and distant                                      | 8 (4%)                               | 0 (0%)                         |                |
| Local, regional and distant                            | 2 (1%)                               | 1 (1%)                         |                |
| Isolated regional                                      | 1 (<1%)                              | 48 (56%)                       |                |
| Regional and distant                                   | 4 (2%)                               | 11 (13%)                       |                |
| Isolated distant                                       | 4 (2%)                               | 10 (12%)                       |                |
| <b>Median crude time to invasive recurrence, years</b> |                                      |                                |                |
| All recurrences                                        | 6.3                                  | 5.5                            | 0.24           |
| Any local                                              | 7.0                                  | 7.4                            | 0.63           |
| Any regional                                           | 5.9                                  | 5.3                            | 0.05           |
| Any distant*                                           | -                                    | 5.9                            | n/a            |

**Supplemental Table 3.** Comparison of pathologic T stage and nuclear grade of the invasive recurrence between patients originally treated with mastectomy with and without DCIS noted in the recurrence specimen

\*Missing data on DCIS in recurrence for 108 (24%) of patients

\*\*Unknown categories are not considered in p-value calculation

|                           | <b>DCIS in recurrence specimen*<br/>(n = 19)</b> | <b>No DCIS in recurrence specimen<br/>(n = 66)</b> | <b>p-value**</b> |
|---------------------------|--------------------------------------------------|----------------------------------------------------|------------------|
| <b>Pathologic T stage</b> |                                                  |                                                    | 0.3              |
| T1                        | 6 (35%)                                          | 7 (16%)                                            |                  |
| T2                        | 0 (0)                                            | 2 (4.7%)                                           |                  |
| T3                        | 0 (0)                                            | 0 (0)                                              |                  |
| T4                        | 10 (59%)                                         | 25 (58%)                                           |                  |
| Tx                        | 1 (5.9%)                                         | 9 (21%)                                            |                  |
| Unknown**                 | 2                                                | 23                                                 |                  |
| <b>Nuclear grade</b>      |                                                  |                                                    |                  |
| High                      | 11 (69%)                                         | 18 (72%)                                           | 0.8              |
| Intermediate              | 5 (31%)                                          | 6 (24%)                                            |                  |
| Low                       | 0 (0)                                            | 1 (4%)                                             |                  |
| Unknown**                 | 3                                                | 41                                                 |                  |
